# Supplementary material for: Development and content validation of a questionnaire identifying patients’ functional priorities and abilities after hip or knee arthroplasty
Source: bioRxiv or medRxiv preprint supplement (doi:10.1101/2024.03.20.24304636), 2024-03-22
Supplement: Supplementary file [file media-1.pdf]

Appendix A. Final version of the questionnaire

**Please read these important instructions:**

Please rate each activity on two aspects:

1. How **important** the activity is to you **today**. When rating importance, please do not think about your ability to do it. Only consider how important it is for you **today**, not what you think will be important in the future.
2. Your **ability** to do the activity **today**. If you are using an aid (such as a cane, crutches, walker, etc.), assess your ability with the aid you use.

Thank you for participating in our study!

## Changing and holding a body position

### Lying down in bed and getting up

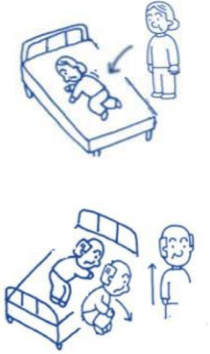

**Today**, being able to lie down in bed and get up is ...

- Not important
- Slightly Important
- Important
- Very important

**Today**, how difficult is it to lie down in bed and get up?

- Unable to do
- A lot of difficulty
- A little difficulty
- No difficulty
- I don't know
- I never do this

### Rolling over (such as back to side)

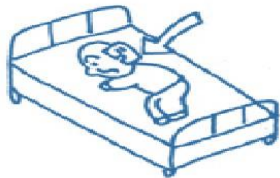

**Today**, being able to roll over is ...

- Not important
- Slightly Important
- Important
- Very important

**Today**, how difficult is it to roll over?

- Unable to do
- A lot of difficulty
- A little difficulty
- No difficulty
- I don't know
- I never do this

### Hold a lying position during the day

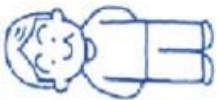

**Today**, being able to hold a lying position during the day is ...

- Not important
- Slightly Important
- Important
- Very important

**Today**, how long can you hold a lying position during the day?

- Unable to do
- Less than 10 minutes
- 11-30 minutes
- 31-60 minutes
- More than 1 hour
- I don't know
- I never do this

|                                                                                                                                                   |                                                                                                                                            |                                                                                                                                                                                                                                                                                                                                                                                                                                                                                 |
|---------------------------------------------------------------------------------------------------------------------------------------------------|--------------------------------------------------------------------------------------------------------------------------------------------|---------------------------------------------------------------------------------------------------------------------------------------------------------------------------------------------------------------------------------------------------------------------------------------------------------------------------------------------------------------------------------------------------------------------------------------------------------------------------------|
| <p><b>Squatting down (partial or full squat)</b></p>              | <p><b>Today</b>, being able to squat down is ...</p> <hr/> <p><b>Today</b>, how difficult is it to squat down?</p>                         | <p><input type="checkbox"/> Not important<br/> <input type="checkbox"/> Slightly Important<br/> <input type="checkbox"/> Important<br/> <input type="checkbox"/> Very important</p> <hr/> <p><input type="checkbox"/> Unable to do<br/> <input type="checkbox"/> A lot of difficulty<br/> <input type="checkbox"/> A little difficulty<br/> <input type="checkbox"/> No difficulty<br/> <input type="checkbox"/> I don't know<br/> <input type="checkbox"/> I never do this</p> |
| <p><b>Hold a squatting position (partial or full squat)</b></p>  | <p><b>Today</b>, being able to hold a squatting position is ...</p> <hr/> <p><b>Today</b>, how long can you hold a squatting position?</p> | <p><input type="checkbox"/> Not important<br/> <input type="checkbox"/> Slightly Important<br/> <input type="checkbox"/> Important<br/> <input type="checkbox"/> Very important</p> <hr/> <p><input type="checkbox"/> Unable to do<br/> <input type="checkbox"/> Less than 1 minute<br/> <input type="checkbox"/> 1-5 minutes<br/> <input type="checkbox"/> More than 5 minutes<br/> <input type="checkbox"/> I don't know<br/> <input type="checkbox"/> I never do this</p>    |
| <p><b>Kneeling down on the ground</b></p>                       | <p><b>Today</b>, being able to kneel down is ...</p> <hr/> <p><b>Today</b>, how difficult is it to kneel down?</p>                         | <p><input type="checkbox"/> Not important<br/> <input type="checkbox"/> Slightly Important<br/> <input type="checkbox"/> Important<br/> <input type="checkbox"/> Very important</p> <hr/> <p><input type="checkbox"/> Unable to do<br/> <input type="checkbox"/> A lot of difficulty<br/> <input type="checkbox"/> A little difficulty<br/> <input type="checkbox"/> No difficulty<br/> <input type="checkbox"/> I don't know<br/> <input type="checkbox"/> I never do this</p> |
| <p><b>Hold a kneeling position</b></p>                          | <p><b>Today</b>, being able to hold a kneeling position is ...</p> <hr/> <p><b>Today</b>, how long can you hold a kneeling position?</p>   | <p><input type="checkbox"/> Not important<br/> <input type="checkbox"/> Slightly Important<br/> <input type="checkbox"/> Important<br/> <input type="checkbox"/> Very important</p> <hr/> <p><input type="checkbox"/> Unable to do<br/> <input type="checkbox"/> Less than 1 minute<br/> <input type="checkbox"/> 1-5 minutes<br/> <input type="checkbox"/> More than 5 minutes<br/> <input type="checkbox"/> I don't know<br/> <input type="checkbox"/> I never do this</p>    |

|                                                                                                                                                                           |                                                                                                                                                                                                                                                                                                              |                                                                                                                                                                        |
|---------------------------------------------------------------------------------------------------------------------------------------------------------------------------|--------------------------------------------------------------------------------------------------------------------------------------------------------------------------------------------------------------------------------------------------------------------------------------------------------------|------------------------------------------------------------------------------------------------------------------------------------------------------------------------|
| <p><b>Sitting on a chair</b><br/>(average height with or without arms)</p>                | <p><b>Today</b>, being able to sit on a chair is ...</p>                                                                                                                                                                                                                                                     | <input type="checkbox"/> Not important<br><input type="checkbox"/> Slightly Important<br><input type="checkbox"/> Important<br><input type="checkbox"/> Very important |
| <p><b>Today</b>, how difficult is it to sit on a chair?</p>                                                                                                               | <input type="checkbox"/> Unable to do<br><input type="checkbox"/> A lot of difficulty<br><input type="checkbox"/> A little difficulty<br><input type="checkbox"/> No difficulty<br><input type="checkbox"/> I don't know<br><input type="checkbox"/> I never do this                                         |                                                                                                                                                                        |
| <p><b>Hold a sitting position</b></p>                                                     | <p><b>Today</b>, being able to hold a sitting position is ...</p>                                                                                                                                                                                                                                            | <input type="checkbox"/> Not important<br><input type="checkbox"/> Slightly Important<br><input type="checkbox"/> Important<br><input type="checkbox"/> Very important |
| <p><b>Today</b>, how long can you hold a sitting position?</p>                                                                                                            | <input type="checkbox"/> Unable to do<br><input type="checkbox"/> Less than 10 minutes<br><input type="checkbox"/> 11-30 minutes<br><input type="checkbox"/> 31-60 minutes<br><input type="checkbox"/> More than 1 hour<br><input type="checkbox"/> I don't know<br><input type="checkbox"/> I never do this |                                                                                                                                                                        |
| <p><b>Rising from a chair</b> (average height with or without arms)</p>                 | <p><b>Today</b>, being able to rise from a chair is ...</p>                                                                                                                                                                                                                                                  | <input type="checkbox"/> Not important<br><input type="checkbox"/> Slightly Important<br><input type="checkbox"/> Important<br><input type="checkbox"/> Very important |
| <p><b>Today</b>, how difficult is it to rise from a chair?</p>                                                                                                            | <input type="checkbox"/> Unable to do<br><input type="checkbox"/> A lot of difficulty<br><input type="checkbox"/> A little difficulty<br><input type="checkbox"/> No difficulty<br><input type="checkbox"/> I don't know<br><input type="checkbox"/> I never do this                                         |                                                                                                                                                                        |
| <p><b>Hold a standing position</b><br/>(such as standing at the sink or in a line)</p>  | <p><b>Today</b>, being able to hold a standing position is ...</p>                                                                                                                                                                                                                                           | <input type="checkbox"/> Not important<br><input type="checkbox"/> Slightly Important<br><input type="checkbox"/> Important<br><input type="checkbox"/> Very important |
| <p><b>Today</b>, how long can you hold a standing position?</p>                                                                                                           | <input type="checkbox"/> Unable to do<br><input type="checkbox"/> Less than 10 minutes<br><input type="checkbox"/> 11-30 minutes<br><input type="checkbox"/> More than 30 minutes<br><input type="checkbox"/> I don't know<br><input type="checkbox"/> I never do this                                       |                                                                                                                                                                        |

|                                                                                                                                                                                                                                       |                                                                                                                                                              |                                                                                                                                                                                                                                                                                                                                                                                                                                                                           |
|---------------------------------------------------------------------------------------------------------------------------------------------------------------------------------------------------------------------------------------|--------------------------------------------------------------------------------------------------------------------------------------------------------------|---------------------------------------------------------------------------------------------------------------------------------------------------------------------------------------------------------------------------------------------------------------------------------------------------------------------------------------------------------------------------------------------------------------------------------------------------------------------------|
| <p><b>Bending over or to the side</b><br/>(such as reaching down for an object)</p>                                                                  | <p><b>Today</b>, being able to bend over or to the side is ...</p> <p><b>Today</b>, how difficult is it to bend over or to the side?</p>                     | <p><input type="checkbox"/> Not important<br/> <input type="checkbox"/> Slightly Important<br/> <input type="checkbox"/> Important<br/> <input type="checkbox"/> Very important</p> <p><input type="checkbox"/> Unable to do<br/> <input type="checkbox"/> A lot of difficulty<br/> <input type="checkbox"/> A little difficulty<br/> <input type="checkbox"/> No difficulty<br/> <input type="checkbox"/> I don't know<br/> <input type="checkbox"/> I never do this</p> |
| <p><b>Shifting the body from side to side</b><br/>(such as moving from one foot to another while standing or shifting your weight while sitting)</p>  | <p><b>Today</b>, being able to shift your body is ...</p> <p><b>Today</b>, how difficult is it to shift your body?</p>                                       | <p><input type="checkbox"/> Not important<br/> <input type="checkbox"/> Slightly Important<br/> <input type="checkbox"/> Important<br/> <input type="checkbox"/> Very important</p> <p><input type="checkbox"/> Unable to do<br/> <input type="checkbox"/> A lot of difficulty<br/> <input type="checkbox"/> A little difficulty<br/> <input type="checkbox"/> No difficulty<br/> <input type="checkbox"/> I don't know<br/> <input type="checkbox"/> I never do this</p> |
| <p><b>Lifting and carrying objects</b></p>                                                                                                                                                                                            |                                                                                                                                                              |                                                                                                                                                                                                                                                                                                                                                                                                                                                                           |
| <p><b>Lifting a light object from the floor (less than 1 pound)</b></p>                                                                             | <p><b>Today</b>, being able to lift a light object from the floor is ...</p> <p><b>Today</b>, how difficult is it to lift a light object from the floor?</p> | <p><input type="checkbox"/> Not important<br/> <input type="checkbox"/> Slightly Important<br/> <input type="checkbox"/> Important<br/> <input type="checkbox"/> Very important</p> <p><input type="checkbox"/> Unable to do<br/> <input type="checkbox"/> A lot of difficulty<br/> <input type="checkbox"/> A little difficulty<br/> <input type="checkbox"/> No difficulty<br/> <input type="checkbox"/> I don't know<br/> <input type="checkbox"/> I never do this</p> |
| <p><b>Lifting a heavy object from the floor (more than 10 pounds)</b></p>                                                                           | <p><b>Today</b>, being able to lift a heavy object from the floor is ...</p> <p><b>Today</b>, how difficult is it to lift a heavy object from the floor?</p> | <p><input type="checkbox"/> Not important<br/> <input type="checkbox"/> Slightly Important<br/> <input type="checkbox"/> Important<br/> <input type="checkbox"/> Very important</p> <p><input type="checkbox"/> Unable to do<br/> <input type="checkbox"/> A lot of difficulty<br/> <input type="checkbox"/> A little difficulty<br/> <input type="checkbox"/> No difficulty<br/> <input type="checkbox"/> I don't know<br/> <input type="checkbox"/> I never do this</p> |

|                                                                                                                                                              |                                                                                                                                                                            |                                                                                                                                                                                                                                                                                                                                                                                                                                                                           |
|--------------------------------------------------------------------------------------------------------------------------------------------------------------|----------------------------------------------------------------------------------------------------------------------------------------------------------------------------|---------------------------------------------------------------------------------------------------------------------------------------------------------------------------------------------------------------------------------------------------------------------------------------------------------------------------------------------------------------------------------------------------------------------------------------------------------------------------|
| <p><b>Putting down objects on the floor</b></p>                             | <p><b>Today</b>, being able to put down objects on the floor is ...</p> <p><b>Today</b>, how difficult is it to put down objects on the floor?</p>                         | <p><input type="checkbox"/> Not important<br/> <input type="checkbox"/> Slightly Important<br/> <input type="checkbox"/> Important<br/> <input type="checkbox"/> Very important</p> <p><input type="checkbox"/> Unable to do<br/> <input type="checkbox"/> A lot of difficulty<br/> <input type="checkbox"/> A little difficulty<br/> <input type="checkbox"/> No difficulty<br/> <input type="checkbox"/> I don't know<br/> <input type="checkbox"/> I never do this</p> |
| <p><b>Carrying in the hands</b><br/>(such as a grocery bag or suitcase)</p>  | <p><b>Today</b>, being able to carry an object in your hands is ...</p> <p><b>Today</b>, how difficult is it to carry an object in your hands?</p>                         | <p><input type="checkbox"/> Not important<br/> <input type="checkbox"/> Slightly Important<br/> <input type="checkbox"/> Important<br/> <input type="checkbox"/> Very important</p> <p><input type="checkbox"/> Unable to do<br/> <input type="checkbox"/> A lot of difficulty<br/> <input type="checkbox"/> A little difficulty<br/> <input type="checkbox"/> No difficulty<br/> <input type="checkbox"/> I don't know<br/> <input type="checkbox"/> I never do this</p> |
| <p><b>Carrying in the arms</b></p>                                        | <p><b>Today</b>, being able to carry an object in your arms is ...</p> <p><b>Today</b>, how difficult is it to carry an object in your arms?</p>                           | <p><input type="checkbox"/> Not important<br/> <input type="checkbox"/> Slightly Important<br/> <input type="checkbox"/> Important<br/> <input type="checkbox"/> Very important</p> <p><input type="checkbox"/> Unable to do<br/> <input type="checkbox"/> A lot of difficulty<br/> <input type="checkbox"/> A little difficulty<br/> <input type="checkbox"/> No difficulty<br/> <input type="checkbox"/> I don't know<br/> <input type="checkbox"/> I never do this</p> |
| <p><b>Carrying on shoulders or back</b><br/>(such as a backpack)</p>       | <p><b>Today</b>, being able to carry an object on your shoulders or back is ...</p> <p><b>Today</b>, how difficult is it to carry an object on your shoulders or back?</p> | <p><input type="checkbox"/> Not important<br/> <input type="checkbox"/> Slightly Important<br/> <input type="checkbox"/> Important<br/> <input type="checkbox"/> Very important</p> <p><input type="checkbox"/> Unable to do<br/> <input type="checkbox"/> A lot of difficulty<br/> <input type="checkbox"/> A little difficulty<br/> <input type="checkbox"/> No difficulty<br/> <input type="checkbox"/> I don't know<br/> <input type="checkbox"/> I never do this</p> |

## Walking

### Walking short distances (less than 1km) on flat surfaces

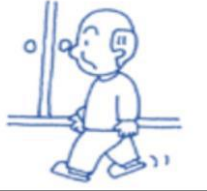

**Today**, being able to walk short distances is ...

- Not important
- Slightly Important
- Important
- Very important

**Today**, how far can you walk short distances (less than 1km)?

- Unable to do
- Less than 70 steps (50m)
- 71 - 300 steps (51-200m)
- 301 - 500 steps (201-500m)
- 501 - 1500 steps (501m-1km)
- I don't know
- I never do this

### Walking long distances (more than 1km) on flat surfaces

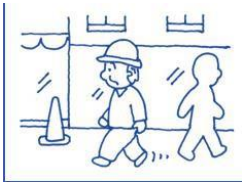

**Today**, being able to walk long distances is ...

- Not important
- Slightly Important
- Important
- Very important

**Today**, how far can you walk long distances (more than 1km)?

- Unable to do
- 1500 - 5000 steps (1km - 4km)
- 5001 - 10 000 steps (4 -7km)
- More than 10 000 steps (more than 7km)
- I don't know
- I never do this

### Walking on different surfaces (slope, uneven, or moving surfaces, such as grass, gravel and snow)

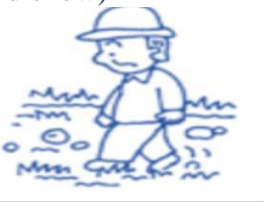

**Today**, being able to walk on different surfaces is ...

- Not important
- Slightly Important
- Important
- Very important

**Today**, how difficult is it to walk on different surfaces?

- Unable to do
- A lot of difficulty
- A little difficulty
- No difficulty
- I don't know
- I never do this

### Walking around obstacles (such as walking around a marketplace or shop, around or through crowded areas)

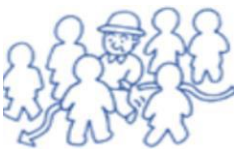

**Today**, being able to walk around obstacles is ...

- Not important
- Slightly Important
- Important
- Very important

**Today**, how difficult is it to walk around obstacles?

- Unable to do
- A lot of difficulty
- A little difficulty
- No difficulty
- I don't know
- I never do this

## Moving around

### Going up stairs (10 to 12 stairs)

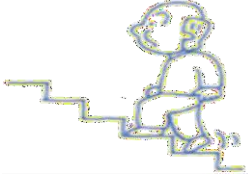

**Today**, being able to go up stairs is ...

- Not important
- Slightly Important
- Important
- Very important

**Today**, how difficult is it to go up stairs?

- Unable to do
- A lot of difficulty
- A little difficulty
- No difficulty
- I don't know
- I never do this

### Going down stairs (10 to 12 stairs)

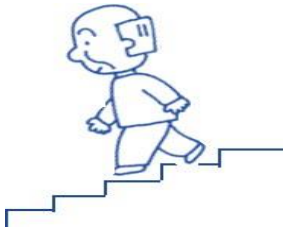

**Today**, being able to go down stairs is ...

- Not important
- Slightly Important
- Important
- Very important

**Today**, how difficult is it to go down stairs?

- Unable to do
- A lot of difficulty
- A little difficulty
- No difficulty
- I don't know
- I never do this

### Going up a curb or step

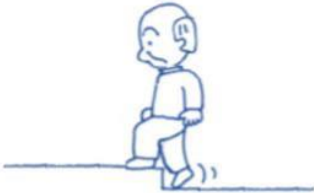

**Today**, being able to go up a curb or step is ...

- Not important
- Slightly Important
- Important
- Very important

**Today**, how difficult is it to go up a curb or step?

- Unable to do
- A lot of difficulty
- A little difficulty
- No difficulty
- I don't know
- I never do this

### Jumping

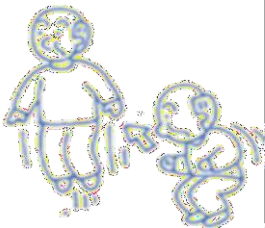

**Today**, being able to jump is ...

- Not important
- Slightly Important
- Important
- Very important

**Today**, how difficult is it to jump?

- Unable to do
- A lot of difficulty
- A little difficulty
- No difficulty
- I don't know
- I never do this



## Moving around using transportation

### Getting in and out of a car (such as own car or taxi)

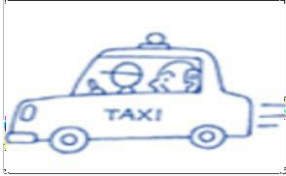

**Today**, being able to get in and out of a car is ...

- Not important
- Slightly Important
- Important
- Very important

**Today**, how difficult is it to get in and out of a car?

- Unable to do
- A lot of difficulty
- A little difficulty
- No difficulty
- I don't know
- I never do this

### Using public transportation (such as a bus or train)

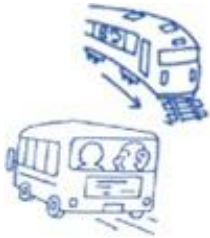

**Today**, being able to use public transportation is ...

- Not important
- Slightly Important
- Important
- Very important

**Today**, how difficult is it to use public transportation?

- Unable to do
- A lot of difficulty
- A little difficulty
- No difficulty
- I don't know
- I never do this

### Biking (to go to a place or recreational)

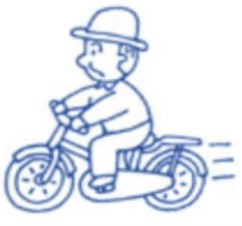

**Today**, being able to bike is ...

- Not important
- Slightly Important
- Important
- Very important

**Today**, how difficult is it to bike?

- Unable to do
- A lot of difficulty
- A little difficulty
- No difficulty
- I don't know
- I never do this

### Driving vehicle

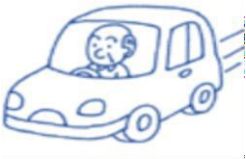

**Today**, being able to drive vehicle is ...

- Not important
- Slightly Important
- Important
- Very important

**Today**, how difficult is it to drive vehicle?

- Unable to do
- A lot of difficulty
- A little difficulty
- No difficulty
- I don't know
- I never do this

## Self-care

**Washing lower body parts**  
(such as legs and feet)

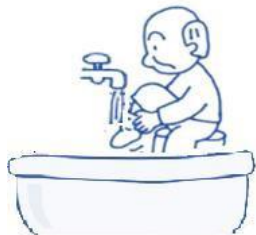

**Today**, being able to wash your lower body parts is ...

- Not important
- Slightly Important
- Important
- Very important

**Today**, how difficult is it to wash your lower body parts?

- Unable to do
- A lot of difficulty
- A little difficulty
- No difficulty
- I don't know
- I never do this

**Washing whole body**

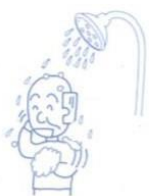

**Today**, being able to wash your whole body is ...

- Not important
- Slightly Important
- Important
- Very important

**Today**, how difficult is it to wash your whole body?

- Unable to do
- A lot of difficulty
- A little difficulty
- No difficulty
- I don't know
- I never do this

**Drying your body**

(drying some part or parts of your body or the whole body, such as after washing)

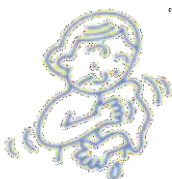

**Today**, being able to dry your body is ...

- Not important
- Slightly Important
- Important
- Very important

**Today**, how difficult is it to dry your body?

- Unable to do
- A lot of difficulty
- A little difficulty
- No difficulty
- I don't know
- I never do this

**Going to the toilet**

(getting to washroom, getting into and out of position, removing and putting back on clothing, and cleaning oneself.)

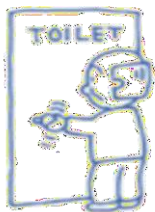

**Today**, being able to go to the toilet is ...

- Not important
- Slightly Important
- Important
- Very important

**Today**, how difficult is it to go to the toilet?

- Unable to do
- A lot of difficulty
- A little difficulty
- No difficulty
- I don't know
- I never do this

|                                                                                                                                       |                                                                                                                            |                                                                                                                                                                                                                                                                                                                                                                                                                                                                           |
|---------------------------------------------------------------------------------------------------------------------------------------|----------------------------------------------------------------------------------------------------------------------------|---------------------------------------------------------------------------------------------------------------------------------------------------------------------------------------------------------------------------------------------------------------------------------------------------------------------------------------------------------------------------------------------------------------------------------------------------------------------------|
| <p><b>Putting on clothes</b></p>                      | <p><b>Today</b>, being able to put on clothes is ...</p> <p><b>Today</b>, how difficult is it to put on clothes?</p>       | <p><input type="checkbox"/> Not important<br/> <input type="checkbox"/> Slightly Important<br/> <input type="checkbox"/> Important<br/> <input type="checkbox"/> Very important</p> <p><input type="checkbox"/> Unable to do<br/> <input type="checkbox"/> A lot of difficulty<br/> <input type="checkbox"/> A little difficulty<br/> <input type="checkbox"/> No difficulty<br/> <input type="checkbox"/> I don't know<br/> <input type="checkbox"/> I never do this</p> |
| <p><b>Taking off clothes</b></p>                      | <p><b>Today</b>, being able to take off clothes is ...</p> <p><b>Today</b>, how difficult is it to take off clothes?</p>   | <p><input type="checkbox"/> Not important<br/> <input type="checkbox"/> Slightly Important<br/> <input type="checkbox"/> Important<br/> <input type="checkbox"/> Very important</p> <p><input type="checkbox"/> Unable to do<br/> <input type="checkbox"/> A lot of difficulty<br/> <input type="checkbox"/> A little difficulty<br/> <input type="checkbox"/> No difficulty<br/> <input type="checkbox"/> I don't know<br/> <input type="checkbox"/> I never do this</p> |
| <p><b>Putting on footwear (shoes or socks)</b></p>  | <p><b>Today</b>, being able to put on footwear is ...</p> <p><b>Today</b>, how difficult is it to put on footwear?</p>     | <p><input type="checkbox"/> Not important<br/> <input type="checkbox"/> Slightly Important<br/> <input type="checkbox"/> Important<br/> <input type="checkbox"/> Very important</p> <p><input type="checkbox"/> Unable to do<br/> <input type="checkbox"/> A lot of difficulty<br/> <input type="checkbox"/> A little difficulty<br/> <input type="checkbox"/> No difficulty<br/> <input type="checkbox"/> I don't know<br/> <input type="checkbox"/> I never do this</p> |
| <p><b>Taking off footwear (shoes or socks)</b></p>  | <p><b>Today</b>, being able to take off footwear is ...</p> <p><b>Today</b>, how difficult is it to take off footwear?</p> | <p><input type="checkbox"/> Not important<br/> <input type="checkbox"/> Slightly Important<br/> <input type="checkbox"/> Important<br/> <input type="checkbox"/> Very important</p> <p><input type="checkbox"/> Unable to do<br/> <input type="checkbox"/> A lot of difficulty<br/> <input type="checkbox"/> A little difficulty<br/> <input type="checkbox"/> No difficulty<br/> <input type="checkbox"/> I don't know<br/> <input type="checkbox"/> I never do this</p> |

## Domestic life and Intimate relationships

### Going shopping

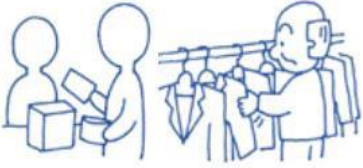

**Today**, being able to go shopping is ...

- Not important
- Slightly Important
- Important
- Very important

**Today**, how difficult is it to go shopping?

- Unable to do
- A lot of difficulty
- A little difficulty
- No difficulty
- I don't know
- I never do this

### Doing housework

(cleaning the house, washing clothes, using household appliances, storing food and disposing of garbage)

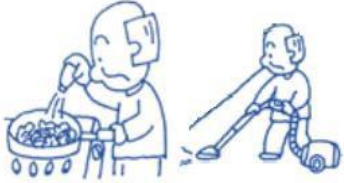

**Today**, being able to do housework is ...

- Not important
- Slightly Important
- Important
- Very important

**Today**, how difficult is it to do housework?

- Unable to do
- A lot of difficulty
- A little difficulty
- No difficulty
- I don't know
- I never do this

### Assisting others

(assisting others with their self-care, movement, within the house or outside)

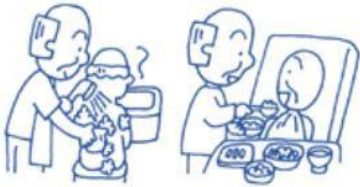

**Today**, being able to assist others is ...

- Not important
- Slightly Important
- Important
- Very important

**Today**, how difficult is it to assist others?

- Unable to do
- A lot of difficulty
- A little difficulty
- No difficulty
- I don't know
- I never do this

### Sexual relationships

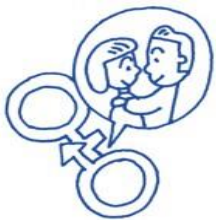

**Today**, being able to have sexual relationships is ...

- Not important
- Slightly Important
- Important
- Very important

**Today**, how difficult is it to have sexual relationships?

- Unable to do
- A lot of difficulty
- A little difficulty
- No difficulty
- I don't know
- I never do this

## Employment

### Paid job (part-time, or full-time)

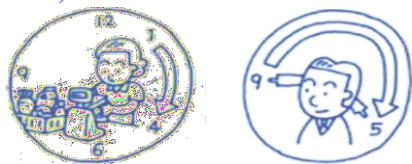

**Today**, being able to do a paid job is ...

- Not important  
 Slightly Important  
 Important  
 Very important

**Today**, how difficult is it to do a paid job?

- Unable to do  
 A lot of difficulty  
 A little difficulty  
 No difficulty  
 I don't know  
 I am retired/ I never do this

### Unpaid work (such as volunteer work)

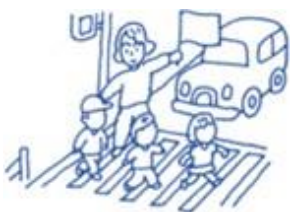

**Today**, being able to do unpaid work is ...

- Not important  
 Slightly Important  
 Important  
 Very important

**Today**, how difficult is it to do unpaid work?

- Unable to do  
 A lot of difficulty  
 A little difficulty  
 No difficulty  
 I don't know  
 I never do this

## Community, social and civic life

### Socializing /Participate in community life

such as:

- Visiting friends or relatives
- Meeting in public places, local groups, social organizations, ceremonies (e.g marriages, etc.)

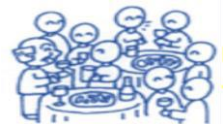

**Today**, being able to socialize and participate in community life is ...

- Not important  
 Slightly Important  
 Important  
 Very important

**Today**, how difficult is it to socialize and participate in community life?

- Unable to do  
 A lot of difficulty  
 A little difficulty  
 No difficulty  
 I don't know  
 I never do this

|                                                                                                                                                                                                                                                                                                                                                                                                                             |                                                                                                                                                                                                                                                                      |                                                                                                                                                                        |
|-----------------------------------------------------------------------------------------------------------------------------------------------------------------------------------------------------------------------------------------------------------------------------------------------------------------------------------------------------------------------------------------------------------------------------|----------------------------------------------------------------------------------------------------------------------------------------------------------------------------------------------------------------------------------------------------------------------|------------------------------------------------------------------------------------------------------------------------------------------------------------------------|
| <p><b>Sports</b><br/>such as:</p> <ul style="list-style-type: none"> <li>• Swimming</li> <li>• Golf</li> <li>• Dancing</li> <li>• Workout/gym</li> <li>• Hiking</li> <li>• Skating</li> <li>• Skiing</li> <li>• Bowling</li> <li>• Etc.</li> </ul> 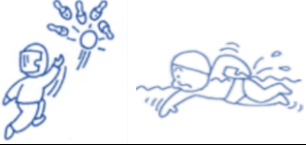                                                                                         | <p><b>Today</b>, being able to do sports is ...</p>                                                                                                                                                                                                                  | <input type="checkbox"/> Not important<br><input type="checkbox"/> Slightly Important<br><input type="checkbox"/> Important<br><input type="checkbox"/> Very important |
| <p><b>Today</b>, how difficult is it to do sports?</p>                                                                                                                                                                                                                                                                                                                                                                      | <input type="checkbox"/> Unable to do<br><input type="checkbox"/> A lot of difficulty<br><input type="checkbox"/> A little difficulty<br><input type="checkbox"/> No difficulty<br><input type="checkbox"/> I don't know<br><input type="checkbox"/> I never do this |                                                                                                                                                                        |
| <p><b>Running/jogging</b></p>                                                                                                                                                                                                                                                                                                               | <p><b>Today</b>, being able to run or jog is ...</p>                                                                                                                                                                                                                 | <input type="checkbox"/> Not important<br><input type="checkbox"/> Slightly Important<br><input type="checkbox"/> Important<br><input type="checkbox"/> Very important |
| <p><b>Today</b>, how difficult is it to run or jog?</p>                                                                                                                                                                                                                                                                                                                                                                     | <input type="checkbox"/> Unable to do<br><input type="checkbox"/> A lot of difficulty<br><input type="checkbox"/> A little difficulty<br><input type="checkbox"/> No difficulty<br><input type="checkbox"/> I don't know<br><input type="checkbox"/> I never do this |                                                                                                                                                                        |
| <p><b>Hobbies/ play /Crafts/ Arts and culture</b><br/>Such as:</p> <ul style="list-style-type: none"> <li>• Gardening</li> <li>• Going to the theatre, cinema, museum</li> <li>• Reading</li> <li>• Singing</li> <li>• Playing an instrument</li> <li>• Pottery or knitting</li> <li>• Playing chess or cards</li> <li>• Etc.</li> </ul>  | <p><b>Today</b>, being able to participate in hobbies, play, crafts, arts and culture is ...</p>                                                                                                                                                                     | <input type="checkbox"/> Not important<br><input type="checkbox"/> Slightly Important<br><input type="checkbox"/> Important<br><input type="checkbox"/> Very important |
| <p><b>Today</b>, how difficult is it to participate in hobbies, play, crafts, arts and culture?</p>                                                                                                                                                                                                                                                                                                                         | <input type="checkbox"/> Unable to do<br><input type="checkbox"/> A lot of difficulty<br><input type="checkbox"/> A little difficulty<br><input type="checkbox"/> No difficulty<br><input type="checkbox"/> I don't know<br><input type="checkbox"/> I never do this |                                                                                                                                                                        |

If **other activities** important to you **today** were not included in this questionnaire, please tell us about them. Rate each activity for your ability to do it and its importance **today**.

|        |                                                                                                                                                                                                                                                                                                                                                                                                            |
|--------|------------------------------------------------------------------------------------------------------------------------------------------------------------------------------------------------------------------------------------------------------------------------------------------------------------------------------------------------------------------------------------------------------------|
| 1..... | <input type="checkbox"/> Slightly Important<br><input type="checkbox"/> Important<br><input type="checkbox"/> Very important<br><hr/> <input type="checkbox"/> Unable to do<br><input type="checkbox"/> A lot of difficulty<br><input type="checkbox"/> A little difficulty<br><input type="checkbox"/> No difficulty<br><input type="checkbox"/> I don't know<br><input type="checkbox"/> I never do this |
| 2..... | <input type="checkbox"/> Slightly Important<br><input type="checkbox"/> Important<br><input type="checkbox"/> Very important<br><hr/> <input type="checkbox"/> Unable to do<br><input type="checkbox"/> A lot of difficulty<br><input type="checkbox"/> A little difficulty<br><input type="checkbox"/> No difficulty<br><input type="checkbox"/> I don't know<br><input type="checkbox"/> I never do this |
| 3..... | <input type="checkbox"/> Slightly Important<br><input type="checkbox"/> Important<br><input type="checkbox"/> Very important<br><hr/> <input type="checkbox"/> Unable to do<br><input type="checkbox"/> A lot of difficulty<br><input type="checkbox"/> A little difficulty<br><input type="checkbox"/> No difficulty<br><input type="checkbox"/> I don't know<br><input type="checkbox"/> I never do this |
| 4..... | <input type="checkbox"/> Slightly Important<br><input type="checkbox"/> Important<br><input type="checkbox"/> Very important<br><hr/> <input type="checkbox"/> Unable to do<br><input type="checkbox"/> A lot of difficulty<br><input type="checkbox"/> A little difficulty<br><input type="checkbox"/> No difficulty<br><input type="checkbox"/> I don't know<br><input type="checkbox"/> I never do this |

Please answer the following questions.

Which surgery did you undergo?

Hip replacement  Knee replacement

Are you currently avoiding certain movements or positions based on your doctor or physiotherapist recommendations?

Yes  No

On average, how much pain have you had in your operated hip or knee in the past 24 hours, 0 being no Worse pain and 100 the worst pain imaginable?

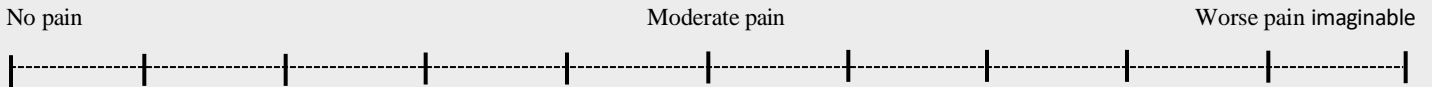

(Place a mark on the scale above)

Do you have any problems or pain in other joints beyond the operated joint?

Yes  No

If yes, the problems or pain is in which joint (s)? Please check all that apply.

Right hip  Right knee  Right foot

Left hip  Left knee  Left foot

Low back  neck  Shoulder

Do you presently use any walking aids? Please check all that apply.

Wheelchair  Walker  Cane  Crutches  Scooter

Other walking aids  Not using any aid

With whom do you live?

alone  with family

Do you have family/relatives that live nearby?

Yes  No

Do you have someone who is dependent on you for their care?

Yes  No

What is your place of residence?

House  Apartment  Retirement Home  Long Term Care Facility  Other

What is the level of activity of your job?

Sedentary  Light physical  Heavy physical  Retired



|  |                                                                                                                                                                                                                                                                                                                                                                                                                                                                                                                                                                                                                                                                                                                                                                                                                             |
|--|-----------------------------------------------------------------------------------------------------------------------------------------------------------------------------------------------------------------------------------------------------------------------------------------------------------------------------------------------------------------------------------------------------------------------------------------------------------------------------------------------------------------------------------------------------------------------------------------------------------------------------------------------------------------------------------------------------------------------------------------------------------------------------------------------------------------------------|
|  | What is your age?                                                                                                                                                                                                                                                                                                                                                                                                                                                                                                                                                                                                                                                                                                                                                                                                           |
|  | What was your sex at birth?<br>Male <input type="checkbox"/> Female <input type="checkbox"/><br><br>What is your gender?<br>Man <input type="checkbox"/> Woman <input type="checkbox"/> or: please specify <input type="checkbox"/>                                                                                                                                                                                                                                                                                                                                                                                                                                                                                                                                                                                         |
|  | In order to calculate your body mass index, please provide your height and weight.<br>Height                      feet/inches<br>Weight                      lbs                                                                                                                                                                                                                                                                                                                                                                                                                                                                                                                                                                                                                                                            |
|  | You may belong to one or more racial or cultural groups on the following list. Select all that apply.<br>White <input type="checkbox"/><br>First Nation, Métis, Inuk (Inuit) <input type="checkbox"/><br>South Asian (e.g., East Indian, Pakistan, Sri Lankan) <input type="checkbox"/><br>Chinese <input type="checkbox"/><br>Black <input type="checkbox"/><br>Filipino <input type="checkbox"/><br>Latin American <input type="checkbox"/><br>Arab <input type="checkbox"/><br>Southeast Asian (e.g., Vietnamese, Cambodian, Malaysian, Laotian) <input type="checkbox"/><br>West Asian (e.g., Iranian, Afghan) <input type="checkbox"/><br>Korean <input type="checkbox"/><br>Japanese <input type="checkbox"/><br>Prefer not to say <input type="checkbox"/><br>Do not know <input type="checkbox"/><br>Other-Specify: |

**Thank you for taking the time to complete this questionnaire!**
